# Supplementary material
Source: Elsevier journal article supplement (https://www.sciencedirect.com/science/article/pii/S2173572722000340)
Supplement: mmc1 [file S2173572722000340:mmc1.pdf]

## **Material Electrónico Suplementario:**

### **Comorbilidades:**

Insuficiencia cardiaca: diagnóstico previo de insuficiencia cardiaca de cualquier causa y gravedad. Considerada como variable dicotómica como SÍ o NO.

Insuficiencia cardiaca, NYHA clases III-IV: diagnóstico previo de insuficiencia cardiaca, con clasificación funcional de la NYHA clase III-IV de cualquier causa. Considerada como variable dicotómica como SÍ o NO.

Enfermedad neuromuscular: diagnóstico previo de cualquier enfermedad neuromuscular y cualquier gravedad en el momento de la valoración. Considerada como variable dicotómica como SÍ o NO.

Enfermedad neurodegenerativa: diagnóstico previo de cualquier enfermedad neurodegenerativa y cualquier gravedad en el momento de la valoración. Considerada como variable dicotómica como SÍ o NO.

EPOC: diagnóstico previo de enfermedad pulmonar obstructiva crónica de cualquier causa y gravedad. Considerada como variable dicotómica como SÍ o NO.

EPOC GOLD III ó IV: diagnóstico previo de enfermedad pulmonar obstructiva crónica de cualquier causa GOLD III ó IV. Considerada como variable dicotómica como SÍ o NO.

Diabetes Mellitus: diagnóstico previo de diabetes mellitus de cualquier causa y gravedad en el momento de la valoración. Considerada como variable dicotómica como SÍ o NO.

Cáncer: diagnóstico previo de cualquier tumoración de origen maligno de cualquier localización y extensión en el momento de la valoración. Considerada como variable dicotómica como SÍ o NO.

Insuficiencia renal crónica: diagnóstico previo de insuficiencia renal crónica de cualquier causa y gravedad en el momento de la valoración. Considerada como variable dicotómica como SÍ o NO.

Cirrosis hepática: diagnóstico previo de cirrosis hepática de cualquier causa en el momento de la valoración. Considerada como variable dicotómica como SÍ o NO.

Cirrosis hepática Child-Pugh clase C: diagnóstico previo de cirrosis hepática Child-Pugh clase C en el momento de la valoración. Considerada como variable dicotómica como SÍ o NO.

Inmunosupresión: diagnóstico previo de alteración de la inmunidad de cualquier causa y gravedad en el momento de la valoración incluyendo las inmunodeficiencias farmacológicas. Considerada como variable dicotómica como SÍ o NO.

Alcoholismo: referencia en la historia clínica de un consumo excesivo de alcohol. Considerada como variable dicotómica como SÍ o NO.

Obesidad: IMC igual o superior a 30. Considerada como variable dicotómica como SÍ o NO.

Otra: cualquier otra enfermedad con diagnóstico previo al momento de la valoración que el médico considere relevante.

### **Motivo de consulta:**

Inestabilidad hemodinámica: situación clínica en la cual el paciente se encuentra hipotenso, taquicárdico y con mala perfusión periférica. Considerada como variable dicotómica como SÍ o NO.

Insuficiencia respiratoria: clínicamente caracterizada por  $pO_2 < 60$  mmHg en sangre arterial, pudiendo asociar síntomas como taquipnea y trabajo respiratorio. Considerada como variable dicotómica como SÍ o NO.

Alteración del nivel de conciencia: paciente que se encuentra obnubilado, estuporoso o en coma, así como con una agitación marcada. Considerada como variable dicotómica como SÍ o NO.

Perfil de sepsis analítico alterado: alteración de los parámetros del perfil de sepsis en el momento de la valoración. Considerada como variable dicotómica como SÍ o NO.

Alteración analítica: cualquier alteración analítica (que no corresponda con parámetros del perfil de sepsis). Considerada como variable dicotómica como SÍ o NO.

Petición paciente/familiar: solicitud de valoración del SMI por parte del paciente y/o la familia. Considerada como variable dicotómica como SÍ o NO.

Parada cardiorrespiratoria abortada: parada cardiorrespiratoria intrahospitalaria en la que se finalizan maniobra de reanimación por la situación previa del paciente. Considerada como variable dicotómica como SÍ o NO.

Activación de escala de detección de enfermo grave: Considerada como variable dicotómica como SÍ o NO.

Cuidados intensivos orientados a la donación: pacientes que ingresan en la UCI como potencial donante de órganos. Considerada como variable dicotómica como SÍ o NO.

Otro: cualquier otro motivo no especificado en los anteriores.
